# Supplementary material for: Molecular Characteristics, Oncogenic Roles, and Relevant Immune and Pharmacogenomic Features of EVA1B in Colorectal Cancer
Source: Front Immunol. 2022 Feb 16;13:809837. doi: 10.3389/fimmu.2022.809837 (PMC8888821; doi:10.3389/fimmu.2022.809837)
Supplement: Supplementary Table S1 — The information of 602 EVA1B-derived genes in CRC patients. [file Table_1.xlsx]

## Sheet: Sheet1
ID	logFC	AveExpr	t	P.Value	adj.P.Val	B
EVA1B	1.29201	2.90789	25.8609	1.40265e-99	7.75216e-95	216.503
CLEC11A	1.10565	3.01323	18.3409	5.86747e-60	1.62142e-55	125.476
CAVIN3	1.23285	3.22277	17.2747	1.49403e-54	2.75241e-50	113.065
SCARF2	1.0403	1.7462	16.7494	6.30574e-52	8.71264e-48	107.039
TNFRSF4	0.804645	1.60643	16.3685	4.84086e-50	5.3509e-46	102.713
MXRA8	1.23527	3.60725	16.1497	5.76576e-49	5.31103e-45	100.245
RCN3	1.0878	3.72659	16.1076	9.26704e-49	7.31672e-45	99.7718
HIC1	0.603939	1.09161	16.0895	1.13656e-48	7.85193e-45	99.5684
SOX18	0.90237	2.07978	15.7279	6.58309e-47	4.0426e-43	95.5241
TSPAN4	0.822338	1.97202	15.5907	3.04104e-46	1.68072e-42	93.9995
TGFB1	1.13524	3.70659	15.5232	6.44022e-46	3.2358e-42	93.252
EFEMP2	0.955442	2.51373	15.4074	2.32876e-45	1.07255e-41	91.9716
UBTD1	0.752359	2.5485	15.3541	4.20378e-45	1.78719e-41	91.3833
IGFBP7	1.12371	7.05999	15.1726	3.11329e-44	1.22904e-40	89.3889
C11orf96	1.13945	3.08296	15.053	1.15861e-43	4.26892e-40	88.0801
SIPA1	0.631102	3.03642	14.8633	9.21728e-43	3.18388e-39	86.0147
LOXL1	0.949684	2.27901	14.7844	2.17737e-42	7.07877e-39	85.1587
LGALS1	1.1595	6.88209	14.6829	6.55758e-42	2.01347e-38	84.0608
SYDE1	0.730129	1.89674	14.6419	1.02284e-41	2.89477e-38	83.6182
TMEM204	0.832006	2.76862	14.6397	1.04754e-41	2.89477e-38	83.5944
RARRES2	1.14842	4.32911	14.5878	1.83666e-41	4.83374e-38	83.0353
VASN	0.835698	2.28783	14.5156	4.00651e-41	1.00651e-37	82.2587
SELENOM	1.00866	3.46389	14.4397	9.07564e-41	2.18084e-37	81.4446
CRIP2	0.884091	2.87131	14.4349	9.55318e-41	2.19994e-37	81.3936
EMP3	0.949501	3.46835	14.051	5.78615e-39	1.27916e-35	77.3083
SPON2	0.943258	3.5986	13.9714	1.3453e-38	2.8597e-35	76.4685
RAB34	0.845284	2.24385	13.949	1.70574e-38	3.49159e-35	76.2323
LTBP3	0.901418	2.65562	13.8699	3.93287e-38	7.49523e-35	75.4008
VAMP5	0.987868	3.92237	13.7406	1.5352e-37	2.73701e-34	74.0455
IGFBP6	1.04359	2.67934	13.6879	2.66597e-37	4.60446e-34	73.4963
VEGFB	0.667103	5.0093	13.6134	5.81927e-37	9.4594e-34	72.7195
PDLIM7	0.79302	3.53201	13.3437	9.60387e-36	1.43456e-32	69.93
CERCAM	0.982466	2.51751	13.184	4.98079e-35	7.24416e-32	68.2926
PCOLCE	1.00587	3.48737	13.1269	8.94725e-35	1.26794e-31	67.7099
TGFB1I1	0.705545	2.5305	13.0872	1.34455e-34	1.81246e-31	67.3048
CLDN5	0.844812	1.5622	13.0648	1.69043e-34	2.17271e-31	67.0771
COL6A2	1.21708	5.86357	12.9893	3.65377e-34	4.58946e-31	66.3105
COX7A1	0.745112	2.15258	12.908	8.35486e-34	9.82461e-31	65.4879
PDLIM4	0.846111	1.8108	12.8144	2.15886e-33	2.48575e-30	64.5438
TYROBP	1.20403	4.61733	12.7307	5.02389e-33	5.5532e-30	63.7039
APOE	1.6607	4.95234	12.717	5.77036e-33	6.25326e-30	63.5662
RAMP2	0.743063	2.96656	12.6777	8.56327e-33	9.10143e-30	63.1737
MCRIP1	0.585592	3.5948	12.614	1.62464e-32	1.69416e-29	62.5369
CCDC85B	1.09884	4.38845	12.5143	4.40336e-32	4.3458e-29	61.5456
AXL	0.814276	2.47858	12.4999	5.08328e-32	4.92882e-29	61.4029
HES4	1.14466	2.76609	12.4872	5.76815e-32	5.49645e-29	61.2772
EMILIN1	1.09181	4.21797	12.4296	1.02348e-31	9.58743e-29	60.7072
RAB3IL1	0.690797	1.74042	12.4143	1.19181e-31	1.09782e-28	60.5558
FSTL3	0.936038	2.90806	12.4121	1.21792e-31	1.10348e-28	60.5343
GYPC	0.67892	1.70922	12.3595	2.05245e-31	1.8296e-28	60.0155
MFGE8	0.845377	3.51289	12.2943	3.91453e-31	3.4341e-28	59.3737
HTRA1	0.977169	4.62007	12.1936	1.05561e-30	8.83961e-28	58.3878
RGS19	0.745196	2.43445	12.1218	2.13661e-30	1.76248e-27	57.687
CEBPB	0.71636	4.99902	12.0868	3.01072e-30	2.447e-27	57.3462
CMTM3	0.755475	2.69584	12.0608	3.8797e-30	3.10758e-27	57.0942
HTRA3	1.13425	3.64513	12.0374	4.87628e-30	3.79581e-27	56.867
PLEKHF1	0.62027	1.74607	12.0304	5.22304e-30	4.00926e-27	56.7988
KLF2	0.938583	3.15076	12.0255	5.47637e-30	4.14614e-27	56.7517
THY1	0.926882	3.93242	11.9822	8.35294e-30	5.99546e-27	56.3322
CD14	1.02495	4.48732	11.9182	1.55539e-29	1.10209e-26	55.7145
FAM19A5	0.594729	1.20724	11.9142	1.6157e-29	1.13034e-26	55.6767
MSC	0.668642	1.86122	11.9065	1.7423e-29	1.17545e-26	55.6018
ISLR	1.26014	4.15435	11.9064	1.74399e-29	1.17545e-26	55.6008
CD248	0.999917	3.79755	11.8781	2.29245e-29	1.50832e-26	55.3291
PODNL1	0.605589	1.35648	11.8751	2.3597e-29	1.5343e-26	55.3004
TUBB6	0.799923	2.79131	11.8713	2.44994e-29	1.56113e-26	55.2631
IER5L	0.718276	2.71082	11.8344	3.4984e-29	2.14833e-26	54.9092
TBCAP1	-0.921244	1.49654	-11.7168	1.08617e-28	6.38624e-26	53.7837
LDOC1	0.664428	1.50817	11.7134	1.12127e-28	6.45522e-26	53.7522
MFAP2	0.93263	2.71898	11.7079	1.18235e-28	6.73673e-26	53.6995
TMEM160	1.26954	3.9928	11.6993	1.28396e-28	7.241e-26	53.6176
HMGN2P17	-0.657367	0.865685	-11.6932	1.3622e-28	7.60467e-26	53.5588
A4GALT	0.743372	1.90864	11.6885	1.42455e-28	7.87321e-26	53.5144
LBH	0.782419	3.55775	11.6857	1.4637e-28	8.00948e-26	53.4874
SERPINH1	0.593372	5.46942	11.6807	1.53435e-28	8.31376e-26	53.4406
CPXM1	0.884886	2.66638	11.6607	1.85874e-28	9.97368e-26	53.2501
HSD17B14	0.594237	1.48858	11.6107	2.99752e-28	1.59295e-25	52.7755
SPI1	0.91729	2.86122	11.5976	3.39617e-28	1.77075e-25	52.6514
SPHK1	0.860248	1.79096	11.5956	3.46212e-28	1.78826e-25	52.6323
CYGB	0.668995	2.6658	11.5927	3.55997e-28	1.82178e-25	52.6047
CALHM2	0.629455	1.99519	11.5767	4.14539e-28	2.08279e-25	52.4535
BGN	1.27571	6.273	11.5687	4.47288e-28	2.22709e-25	52.3779
RWDD4P2	-0.723682	1.03973	-11.5551	5.09114e-28	2.49006e-25	52.2494
PTGES3P3	-0.782444	1.32725	-11.5538	5.1561e-28	2.49971e-25	52.2368
HAPLN3	0.845384	2.2648	11.4964	8.89609e-28	4.2023e-25	51.6951
LSM12P1	-0.694225	1.40564	-11.495	9.01858e-28	4.22406e-25	51.6815
PLEKHO2	0.660365	2.84988	11.4574	1.28795e-27	5.98171e-25	51.3276
AC103810.3	1.15819	2.8989	11.4477	1.41146e-27	6.50073e-25	51.2367
TYMP	1.0188	3.86858	11.4335	1.61358e-27	7.37021e-25	51.1038
HNRNPCP2	-1.12679	2.81813	-11.4309	1.65484e-27	7.49668e-25	51.0787
GJA4	0.647421	2.21232	11.4146	1.92897e-27	8.6675e-25	50.9265
TIMP3	0.690888	1.23724	11.3739	2.83351e-27	1.26018e-24	50.5447
FAM20C	0.782398	2.55205	11.3733	2.85015e-27	1.26018e-24	50.5389
EGFL7	0.76581	2.70825	11.3631	3.13688e-27	1.37594e-24	50.4437
REX1BD	0.738789	3.65176	11.2921	6.11491e-27	2.6403e-24	49.781
TPGS1	0.693634	1.32152	11.2871	6.40861e-27	2.74567e-24	49.7344
C4orf48	1.27852	4.36025	11.2184	1.21852e-26	5.10189e-24	49.0965
COL6A1	1.02682	5.49538	11.183	1.69622e-26	6.99602e-24	48.7681
HMGB1P10	-1.1197	1.8433	-11.1622	2.05823e-26	8.3643e-24	48.5761
COPZ2	0.677591	1.8147	11.1116	3.29598e-26	1.32965e-23	48.1087
RTL8B	0.581531	1.50917	11.0492	5.87422e-26	2.30253e-23	47.5352
LST1	0.656831	1.70831	11.0344	6.73925e-26	2.62299e-23	47.3988
RAMP3	0.627535	2.92396	11.0276	7.17406e-26	2.7727e-23	47.3368
FBLN1	1.14729	3.40115	11.0201	7.68836e-26	2.95083e-23	47.2681
NOTCH3	0.785502	3.09166	10.9777	1.13677e-25	4.30323e-23	46.88
TRPV2	0.633439	2.07844	10.9668	1.25731e-25	4.66371e-23	46.78
MYL9	1.08768	5.50263	10.9336	1.70595e-25	6.16238e-23	46.4771
TIMP1	0.701769	7.50642	10.9032	2.25519e-25	8.09351e-23	46.2002
IL4I1	0.832281	1.95753	10.9004	2.31426e-25	8.25191e-23	46.1745
GPR68	0.637823	1.55193	10.8559	3.47651e-25	1.21607e-22	45.7707
FAM173A	0.815534	3.26116	10.8479	3.74133e-25	1.29235e-22	45.6979
C1QC	1.13734	5.5589	10.8099	5.2949e-25	1.80641e-22	45.3533
PRRX2	0.717186	1.25693	10.7816	6.85176e-25	2.30667e-22	45.0976
EHD2	0.850832	3.45792	10.7797	6.97143e-25	2.32107e-22	45.0804
LRRC32	0.721222	3.15431	10.7623	8.16461e-25	2.68596e-22	44.9237
MAFB	0.824836	2.23595	10.7282	1.11276e-24	3.63907e-22	44.6165
SCAND1	0.798454	5.18705	10.723	1.16694e-24	3.77162e-22	44.5693
STAB1	0.717403	2.17716	10.7189	1.21103e-24	3.89134e-22	44.5326
TNFRSF18	0.643625	1.4727	10.7151	1.25352e-24	4.0046e-22	44.4983
C1QB	1.14628	5.30497	10.6968	1.47934e-24	4.67201e-22	44.334
SHISA4	0.629021	1.71665	10.6744	1.81192e-24	5.68984e-22	44.1329
PLEKHO1	0.592472	2.07637	10.6527	2.20569e-24	6.84853e-22	43.9378
SPARC	0.999632	7.23891	10.6402	2.4672e-24	7.57539e-22	43.8267
FBLN2	1.13817	2.77288	10.6161	3.06704e-24	9.31368e-22	43.6108
GPC1	0.739679	2.77963	10.5999	3.5502e-24	1.05491e-21	43.4657
RPL41P1	-3.05706	4.80215	-10.5959	3.67943e-24	1.08746e-21	43.4302
TNFSF12	0.602368	2.65718	10.5617	5.00389e-24	1.43293e-21	43.1253
SERPINF1	0.903465	3.96311	10.5294	6.68513e-24	1.8755e-21	42.838
SLC15A3	0.669612	2.09016	10.5219	7.15099e-24	1.99606e-21	42.7712
MMP2	1.13945	5.28266	10.4331	1.58099e-23	4.28324e-21	41.9845
ADAMTS2	0.93528	2.52099	10.4181	1.80668e-23	4.87082e-21	41.8522
ODF3B	0.696845	2.1507	10.4158	1.84359e-23	4.9462e-21	41.8321
HOPX	0.644905	1.15862	10.3998	2.1252e-23	5.67419e-21	41.6912
PPP1R14A	0.738819	2.05281	10.3913	2.29337e-23	6.06458e-21	41.6156
CTSF	0.760841	2.47363	10.3848	2.42884e-23	6.39089e-21	41.5587
PPIAP22	-0.884791	5.38099	-10.3834	2.45978e-23	6.4126e-21	41.5462
ABI3	0.581652	2.0926	10.3659	2.87296e-23	7.45458e-21	41.3922
AEBP1	1.20359	4.95287	10.3625	2.95943e-23	7.64307e-21	41.3628
ADGRA2	0.675755	2.2309	10.3513	3.26875e-23	8.40266e-21	41.2643
AC113935.1	-1.73706	3.3415	-10.3474	3.38366e-23	8.65777e-21	41.23
RABAC1	0.602357	5.44481	10.3289	3.98706e-23	1.00162e-20	41.0673
HOMER3	0.599553	1.93721	10.3179	4.39508e-23	1.08441e-20	40.9708
RPL6P27	-0.926017	2.70448	-10.3115	4.64934e-23	1.13198e-20	40.915
NME3	0.674054	4.53932	10.3061	4.87631e-23	1.18203e-20	40.8677
CEBPD	0.715305	4.22788	10.2821	6.02535e-23	1.43538e-20	40.658
YPEL3	0.677066	3.25005	10.258	7.45542e-23	1.74596e-20	40.4469
COL1A1	1.27946	7.42537	10.2531	7.78284e-23	1.81494e-20	40.4043
OLFML2B	0.861633	2.85769	10.2452	8.34165e-23	1.92898e-20	40.3355
ACP5	0.828733	3.86235	10.2365	9.00257e-23	2.04755e-20	40.26
DKK3	0.720157	3.41256	10.2313	9.42427e-23	2.12596e-20	40.2146
YWHAZP5	-0.700171	1.14747	-10.2231	1.0127e-22	2.25685e-20	40.1433
C1QA	1.00577	5.2965	10.178	1.50419e-22	3.31209e-20	39.7512
NDN	0.695022	2.28537	10.1446	2.01603e-22	4.40403e-20	39.4609
HMGB1P5	-1.57124	2.86243	-10.1191	2.51902e-22	5.45966e-20	39.2401
CDKN1C	0.728363	2.14252	10.0988	3.00553e-22	6.41351e-20	39.0651
NXN	0.673711	1.6844	10.0883	3.2924e-22	6.97182e-20	38.9748
MRGPRF	0.76587	1.82603	10.0825	3.46298e-22	7.30503e-20	38.9247
HMGB1P6	-1.38399	3.73683	-10.0668	3.9715e-22	8.2829e-20	38.789
HMGN2P3	-0.690703	1.05137	-10.0617	4.14993e-22	8.6225e-20	38.7454
COL18A1	0.785892	3.75327	10.0517	4.52614e-22	9.33398e-20	38.6594
ANGPTL2	0.916369	3.36684	10.0279	5.56775e-22	1.13549e-19	38.4542
PILRA	0.655941	1.53445	10.0256	5.6773e-22	1.15358e-19	38.4349
IGLJ2	1.72454	1.85965	9.99931	7.12932e-22	1.41735e-19	38.2092
PDGFRB	0.808752	3.60848	9.9888	7.80744e-22	1.5466e-19	38.1192
LRRC25	0.604248	1.55408	9.97529	8.77479e-22	1.72586e-19	38.0035
FBXL15	0.584778	3.04058	9.96385	9.68551e-22	1.89822e-19	37.9056
AL138785.1	1.64499	2.07047	9.96186	9.85337e-22	1.9243e-19	37.8886
TUBA1A	0.754486	4.31946	9.94666	1.12334e-21	2.17841e-19	37.7588
LAPTM5	0.923739	4.8252	9.93546	1.23717e-21	2.38979e-19	37.6631
SERPING1	0.987275	4.4519	9.90239	1.64438e-21	3.11238e-19	37.3813
YWHAZP4	-0.702185	1.14226	-9.88261	1.94874e-21	3.67586e-19	37.213
C1R	0.868381	4.41607	9.84424	2.70739e-21	5.03811e-19	36.8873
CTU1	0.688691	2.14465	9.84356	2.72338e-21	5.05086e-19	36.8815
CTSK	0.934882	5.04178	9.82444	3.20708e-21	5.90829e-19	36.7196
GGT5	0.67072	1.97208	9.81828	3.38044e-21	6.18642e-19	36.6674
CHPF	0.595269	5.65453	9.81664	3.42799e-21	6.25275e-19	36.6536
CST2	0.848175	1.3672	9.80711	3.71848e-21	6.7161e-19	36.573
GPX7	0.644773	2.08825	9.78805	4.37518e-21	7.82548e-19	36.4119
CTHRC1	1.09902	3.71569	9.78018	4.67868e-21	8.34133e-19	36.3455
VMO1	0.588655	1.435	9.7702	5.09368e-21	9.023e-19	36.2614
AC074085.2	1.33351	1.56685	9.73922	6.6284e-21	1.1593e-18	36.0005
NNMT	0.881771	3.39747	9.73567	6.83153e-21	1.18731e-18	35.9706
PODN	0.753825	1.96681	9.64179	1.51204e-20	2.48712e-18	35.1839
FOLR2	0.837773	1.99044	9.62411	1.75495e-20	2.86114e-18	35.0364
RFTN1	0.586687	2.4952	9.6188	1.83511e-20	2.97428e-18	34.9922
FHL3	0.589028	2.91606	9.58944	2.34925e-20	3.76343e-18	34.7477
VSIG4	0.910428	2.18524	9.58529	2.43245e-20	3.87426e-18	34.7132
DOK2	0.620124	1.76777	9.58004	2.5422e-20	4.03742e-18	34.6695
PDPN	0.749431	2.82566	9.55171	3.22397e-20	5.04766e-18	34.4343
TWIST1	0.585143	1.1671	9.51996	4.20475e-20	6.4732e-18	34.1714
PLPP4	0.675853	1.07494	9.51892	4.24163e-20	6.51184e-18	34.1628
VIM	0.757865	5.57573	9.49822	5.04191e-20	7.69769e-18	33.9917
PHLDA3	0.814185	3.13976	9.491	5.35478e-20	8.15284e-18	33.9321
ENG	0.598357	4.24724	9.45755	7.0749e-20	1.06254e-17	33.6564
DCN	0.985194	3.47665	9.44771	7.67859e-20	1.14388e-17	33.5753
TREM2	0.910303	2.2444	9.44493	7.85746e-20	1.16738e-17	33.5526
COMP	1.26404	2.03068	9.44074	8.13585e-20	1.19907e-17	33.5181
AC107956.1	-0.988217	2.24403	-9.41221	1.03092e-19	1.49939e-17	33.2838
H3F3A	-0.779156	3.14583	-9.40567	1.08834e-19	1.57875e-17	33.2301
ITGB2	0.892691	2.92072	9.39332	1.20559e-19	1.74425e-17	33.1289
RTL8C	0.809149	4.83486	9.38124	1.33222e-19	1.91244e-17	33.0301
ITGA11	0.733516	1.7213	9.36884	1.47602e-19	2.11339e-17	32.9286
IRF7	0.604517	3.34067	9.36457	1.52906e-19	2.17557e-17	32.8937
FAUP1	1.16415	1.92921	9.34067	1.86232e-19	2.60574e-17	32.6986
HCK	0.695008	2.27276	9.33035	2.02759e-19	2.8156e-17	32.6145
MMP11	1.09063	4.0425	9.3105	2.38749e-19	3.27423e-17	32.4528
MFAP4	1.03039	3.79973	9.3028	2.54353e-19	3.471e-17	32.3902
ADAM8	0.696599	2.05434	9.2976	2.6546e-19	3.60478e-17	32.3479
MRC2	0.7871	2.93819	9.29202	2.77924e-19	3.75557e-17	32.3025
THBS2	1.26125	3.76708	9.27705	3.14236e-19	4.22559e-17	32.181
C5AR1	0.675047	2.08259	9.26267	3.53573e-19	4.74303e-17	32.0643
CD37	0.614013	1.56201	9.24442	4.10539e-19	5.44116e-17	31.9165
COL1A2	1.08377	6.67258	9.24098	4.22283e-19	5.58343e-17	31.8886
LOXL2	0.670208	3.44027	9.23446	4.45398e-19	5.83324e-17	31.8359
IGHJ3	1.8941	4.08296	9.22928	4.64651e-19	6.05668e-17	31.7941
TMA7	-0.651986	5.74785	-9.20532	5.65034e-19	7.31342e-17	31.6006
SFRP4	1.31721	2.77041	9.20235	5.78885e-19	7.47518e-17	31.5766
CSF1R	0.769569	2.56203	9.17947	6.97526e-19	8.92381e-17	31.3922
MT-TY	2.3501	5.13068	9.17488	7.24074e-19	9.22516e-17	31.3553
CYBA	0.742173	6.02929	9.16865	7.61718e-19	9.67785e-17	31.3051
AC090498.1	-1.08958	4.11578	-9.16795	7.66085e-19	9.71101e-17	31.2995
SFRP2	1.67356	3.38525	9.15702	8.3728e-19	1.0541e-16	31.2116
IGLJ3	1.29905	1.25481	9.15606	8.43801e-19	1.05989e-16	31.2039
ITGAX	0.622261	1.56226	9.15074	8.81093e-19	1.10422e-16	31.1611
ALKBH7	0.600563	5.26909	9.145	9.23104e-19	1.15385e-16	31.1151
FNDC1	0.980533	2.09835	9.1406	9.56654e-19	1.18283e-16	31.0798
COL3A1	1.07628	7.46383	9.13546	9.97393e-19	1.2277e-16	31.0385
PLAT	0.611668	3.05487	9.12743	1.06453e-18	1.30453e-16	30.9741
HCST	0.651652	1.86464	9.12583	1.07837e-18	1.31857e-16	30.9613
ADAT3	0.611224	1.99115	9.1081	1.24487e-18	1.50222e-16	30.8193
TAGLN	1.03206	5.18137	9.09647	1.36775e-18	1.63975e-16	30.7262
TIMP2	0.854941	4.76333	9.09304	1.40617e-18	1.68217e-16	30.6988
FTLP3	1.15534	3.31089	9.06667	1.73987e-18	2.02868e-16	30.4883
TMEM119	0.701327	2.49434	9.05729	1.87653e-18	2.16971e-16	30.4135
ACTBP2	0.981918	1.43196	9.03861	2.18131e-18	2.496e-16	30.2647
YBX1P10	-0.594607	2.25291	-9.02815	2.37277e-18	2.69277e-16	30.1815
PDLIM3	0.617322	1.53923	9.01849	2.56441e-18	2.89245e-16	30.1047
ELN	0.848665	2.82665	8.99019	3.21826e-18	3.55734e-16	29.8802
GFPT2	0.611283	1.07981	8.97536	3.62412e-18	3.98207e-16	29.7628
UQCRFS1P1	0.856254	1.09893	8.96673	3.88336e-18	4.22491e-16	29.6945
METRNL	0.603814	4.02392	8.95998	4.09866e-18	4.43297e-16	29.6411
C1S	0.880328	4.46414	8.9504	4.42501e-18	4.7304e-16	29.5654
AL355309.1	1.32702	1.86328	8.93924	4.8376e-18	5.13175e-16	29.4773
RPL39	-0.938555	5.603	-8.92834	5.27682e-18	5.53395e-16	29.3914
CD2AP	-0.580651	3.92644	-8.92369	5.4762e-18	5.73217e-16	29.3547
GLIS2	0.586946	1.78433	8.92061	5.61246e-18	5.8637e-16	29.3304
AC010422.3	0.997811	1.54966	8.89302	6.99108e-18	7.19521e-16	29.1133
AC079922.1	-0.811466	1.57467	-8.88283	7.58117e-18	7.75919e-16	29.0332
MT-TC	2.32397	4.48699	8.87415	8.12208e-18	8.26687e-16	28.9651
PRR7	0.742255	2.66456	8.85617	9.36743e-18	9.41308e-16	28.8241
PDF	0.587286	2.31249	8.85189	9.6901e-18	9.6845e-16	28.7907
EFEMP1	0.864447	2.66864	8.84461	1.02659e-17	1.02046e-15	28.7336
AC099336.2	-1.20845	2.49147	-8.83649	1.09477e-17	1.08046e-15	28.6701
TMEM238	0.912441	4.03577	8.82467	1.20198e-17	1.17665e-15	28.5777
FCER1G	0.846105	4.07688	8.82458	1.20287e-17	1.17665e-15	28.577
AP001024.1	1.085	2.17067	8.8233	1.21514e-17	1.186e-15	28.567
TRBJ2-3	0.707576	1.04606	8.80341	1.42181e-17	1.36425e-15	28.4118
FIBIN	0.71867	2.09668	8.79218	1.55351e-17	1.47779e-15	28.3242
TMEM158	0.667875	2.82741	8.77073	1.83945e-17	1.7115e-15	28.1573
WNT2	0.60985	1.89603	8.76994	1.85097e-17	1.71824e-15	28.1511
LTB	0.637316	2.24324	8.76504	1.92375e-17	1.78094e-15	28.113
GPX3	0.766505	2.9304	8.76218	1.9675e-17	1.81536e-15	28.0908
AP001000.1	-0.771246	1.89404	-8.73679	2.40192e-17	2.17979e-15	27.8937
CFD	1.08789	3.54877	8.72953	2.54269e-17	2.29009e-15	27.8374
RPL13P2	0.843973	1.00787	8.72834	2.56635e-17	2.3063e-15	27.8283
RPL35P1	-0.694751	1.45925	-8.72722	2.58916e-17	2.32302e-15	27.8195
SCX	0.582497	1.70592	8.71975	2.74519e-17	2.44318e-15	27.7617
DDT	-0.592693	3.7247	-8.70379	3.1107e-17	2.75075e-15	27.6382
CD300A	0.580332	1.8399	8.6969	3.28283e-17	2.8891e-15	27.585
FPR1	0.733586	1.51865	8.68809	3.51696e-17	3.08043e-15	27.517
HLA-DPB1	0.916269	4.90184	8.68463	3.61335e-17	3.15985e-15	27.4903
AC012618.1	1.1397	1.52927	8.67806	3.80372e-17	3.32107e-15	27.4396
MRPL41	0.63602	5.31971	8.67539	3.88358e-17	3.38545e-15	27.419
COL8A2	0.620152	1.42095	8.64391	4.96379e-17	4.25992e-15	27.1766
IGHJ1	1.35962	2.03271	8.63222	5.43645e-17	4.62961e-15	27.0868
SSC5D	0.618431	1.20571	8.61055	6.43358e-17	5.39562e-15	26.9205
PTMAP2	-0.654265	2.56198	-8.56851	8.91062e-17	7.2316e-15	26.5988
EIF1P3	0.73023	0.972135	8.56609	9.07846e-17	7.34624e-15	26.5804
RENBP	0.599737	2.02783	8.5594	9.56049e-17	7.71384e-15	26.5293
ACTA2	0.838473	5.54179	8.52439	1.25252e-16	9.88915e-15	26.2626
RPL7P9	-0.833877	3.29166	-8.52364	1.25983e-16	9.93273e-15	26.2569
RPL23AP42	-0.79788	2.22467	-8.5189	1.30664e-16	1.02652e-14	26.2208
AL022718.1	1.69585	2.23432	8.51516	1.34476e-16	1.05239e-14	26.1924
C3AR1	0.68725	2.0751	8.50805	1.42047e-16	1.10176e-14	26.1384
RPL41P5	-1.18022	5.02332	-8.50784	1.42266e-16	1.10176e-14	26.1368
AC018738.1	-1.38105	3.38138	-8.50144	1.49451e-16	1.15039e-14	26.0882
RAB31	0.789924	3.02978	8.50026	1.50811e-16	1.15764e-14	26.0793
IGKJ5	1.52253	2.7352	8.48918	1.64211e-16	1.25008e-14	25.9952
CTSL	0.690787	4.47668	8.42717	2.64015e-16	1.94814e-14	25.5265
CAVIN1	0.683698	4.74822	8.4257	2.6699e-16	1.96485e-14	25.5154
RGCC	0.623493	3.57552	8.4245	2.69456e-16	1.98036e-14	25.5063
RPL12P47	1.03284	1.21928	8.41905	2.809e-16	2.05312e-14	25.4653
GPNMB	0.966922	3.27072	8.4189	2.81214e-16	2.05312e-14	25.4642
FLNA	0.818673	5.68282	8.41266	2.94918e-16	2.13904e-14	25.4172
SDC2	0.641198	2.96119	8.41181	2.96846e-16	2.14739e-14	25.4108
EEF1A1P6	-0.818583	2.64815	-8.4055	3.11467e-16	2.24435e-14	25.3633
ISYNA1	0.649026	2.4052	8.39765	3.30681e-16	2.36712e-14	25.3042
APLNR	0.620497	2.54321	8.3927	3.43378e-16	2.43618e-14	25.267
Z97353.1	0.887607	1.21746	8.38015	3.77772e-16	2.6631e-14	25.1728
ISG15	0.846489	5.39315	8.35265	4.65522e-16	3.2298e-14	24.9667
PTGDS	0.831525	2.51407	8.33715	5.2356e-16	3.57236e-14	24.8508
RPL7P1	-0.632834	1.68962	-8.32956	5.54524e-16	3.76968e-14	24.7941
CLIC3	0.816867	2.38896	8.32893	5.57174e-16	3.78303e-14	24.7894
RPL37AP8	1.1098	1.32164	8.31978	5.97103e-16	4.02448e-14	24.7211
RPL13P12	1.03326	5.5807	8.30672	6.59053e-16	4.42046e-14	24.6237
ANTXR1	0.886953	3.33276	8.29787	7.04556e-16	4.69715e-14	24.5578
RHOD	0.679702	3.56143	8.2817	7.95956e-16	5.28102e-14	24.4374
CALHM6	0.707816	1.88944	8.27535	8.34927e-16	5.51311e-14	24.3903
ACTG1P20	0.996524	1.71462	8.24525	1.04704e-15	6.76819e-14	24.167
GPX1P1	0.945795	1.95359	8.24212	1.07196e-15	6.88241e-14	24.1438
CDH11	0.629316	2.08417	8.23957	1.09266e-15	6.98947e-14	24.1249
PLAU	0.670659	4.38102	8.23599	1.12245e-15	7.15523e-14	24.0983
AC113398.1	1.11293	1.72198	8.2259	1.21065e-15	7.66442e-14	24.0237
ZNF385A	0.583814	2.23956	8.22154	1.25085e-15	7.87377e-14	23.9915
PMP22	0.630592	3.80433	8.22059	1.25981e-15	7.92117e-14	23.9845
TPM2	0.757131	4.72482	8.21905	1.27441e-15	7.99478e-14	23.9731
TPSAB1	0.775779	2.0447	8.21561	1.30773e-15	8.17597e-14	23.9476
CCL21	1.1672	3.30052	8.21379	1.3256e-15	8.27833e-14	23.9343
SPOCK1	0.724271	1.43877	8.20403	1.42614e-15	8.80668e-14	23.8622
AL122020.1	1.15608	2.47378	8.19195	1.56085e-15	9.57439e-14	23.7731
LRP3	0.632781	2.92317	8.18843	1.60245e-15	9.79691e-14	23.7472
FSTL1	0.672379	4.16267	8.17651	1.75161e-15	1.06617e-13	23.6594
RPS19P1	1.00521	1.61463	8.17056	1.83109e-15	1.11087e-13	23.6156
AC005831.1	-0.640877	2.30492	-8.16475	1.91226e-15	1.15505e-13	23.5729
AC021074.1	1.01304	1.73219	8.14658	2.18932e-15	1.31235e-13	23.4394
SLAMF8	0.630466	1.9274	8.13209	2.43825e-15	1.44125e-13	23.3332
ALOX5AP	0.652911	2.78611	8.12203	2.6275e-15	1.54486e-13	23.2595
AL109741.2	0.6274	0.928555	8.11737	2.72001e-15	1.59248e-13	23.2254
COL5A1	0.800451	4.23939	8.11629	2.74179e-15	1.60353e-13	23.2175
LSP1	0.593033	2.56138	8.1006	3.08007e-15	1.77138e-13	23.1028
AKR1B1	0.621552	2.76277	8.08254	3.52043e-15	2.00378e-13	22.9711
AC105399.1	0.636565	0.726013	8.05086	4.4485e-15	2.49098e-13	22.7404
G0S2	0.843685	3.69449	8.03368	5.04839e-15	2.81265e-13	22.6157
GREM1	0.902587	2.53805	8.00787	6.10362e-15	3.33335e-13	22.4286
ACKR1	0.729832	1.60295	7.95814	8.78554e-15	4.72334e-13	22.0696
GAS1	0.714802	1.27064	7.94804	9.45817e-15	5.06329e-13	21.9969
MMP14	0.625032	5.82337	7.92353	1.13082e-14	6.00368e-13	21.8208
COL10A1	1.07065	2.12559	7.8997	1.34488e-14	7.02541e-13	21.65
CCL2	0.726009	2.63934	7.87268	1.63612e-14	8.45092e-13	21.4569
PPP1R14BP3	-0.592467	4.22357	-7.86949	1.67438e-14	8.62438e-13	21.4341
CST3	0.584994	6.86996	7.86694	1.7056e-14	8.76886e-13	21.4159
ROMO1	0.617253	6.90743	7.85466	1.86401e-14	9.50371e-13	21.3284
ICAM1	0.601233	3.38019	7.845	1.99896e-14	1.00894e-12	21.2596
C3	1.04587	3.8726	7.83593	2.13428e-14	1.07234e-12	21.195
MGP	0.921833	3.74421	7.81076	2.55895e-14	1.27298e-12	21.0163
FSCN1	0.812062	3.72905	7.81014	2.57035e-14	1.2775e-12	21.0119
IGHJ2	1.41376	3.02963	7.79019	2.96698e-14	1.45889e-12	20.8706
AC098591.2	0.80607	1.18983	7.78369	3.10886e-14	1.51785e-12	20.8246
TNFAIP2	0.640544	3.05253	7.78298	3.12454e-14	1.52416e-12	20.8196
DPYSL3	0.75517	3.16909	7.77608	3.28338e-14	1.59041e-12	20.7708
MAB21L2	0.667938	1.63877	7.77207	3.37917e-14	1.63394e-12	20.7425
CRYAB	0.593366	1.85081	7.77116	3.40134e-14	1.64323e-12	20.736
ITGA5	0.646053	3.14811	7.73547	4.39137e-14	2.07674e-12	20.4844
AC023906.1	0.757589	0.9011	7.73125	4.52576e-14	2.12735e-12	20.4548
CCDC80	0.713667	1.72652	7.7192	4.93238e-14	2.30045e-12	20.37
SOCS1	0.689106	2.5602	7.71864	4.9522e-14	2.30774e-12	20.3661
CNN1	1.01906	3.09172	7.71537	5.06887e-14	2.35615e-12	20.3432
RPL34P31	0.838287	1.03033	7.71198	5.19283e-14	2.40366e-12	20.3194
RPL35P2	0.891896	1.69602	7.68367	6.35247e-14	2.89916e-12	20.1209
CD4	0.613569	2.8054	7.66522	7.24195e-14	3.27803e-12	19.9919
TNFAIP6	0.646211	1.57622	7.66162	7.42916e-14	3.35179e-12	19.9668
DPT	0.797918	1.8363	7.65357	7.86515e-14	3.52654e-12	19.9107
SULF1	0.935345	3.84644	7.65353	7.86753e-14	3.52654e-12	19.9104
LUM	0.943581	5.97604	7.64661	8.26261e-14	3.68867e-12	19.8621
COL4A2	0.590926	5.40286	7.63194	9.16691e-14	4.04986e-12	19.7599
SNHG25	1.21506	3.10686	7.62578	9.57432e-14	4.21301e-12	19.7171
ATP5MC2P4	0.587058	0.796403	7.60847	1.08195e-13	4.70843e-12	19.5968
OSM	0.694139	1.55915	7.60349	1.1206e-13	4.86513e-12	19.5622
AC009362.1	0.715986	0.904818	7.5999	1.14932e-13	4.96643e-12	19.5373
AC107983.1	-0.656877	1.80144	-7.59778	1.16658e-13	5.03706e-12	19.5227
AC078991.1	0.636223	0.737749	7.57632	1.35675e-13	5.79032e-12	19.3741
COL8A1	0.72593	2.02085	7.57621	1.35782e-13	5.79041e-12	19.3733
AL669983.1	0.710678	1.12797	7.56021	1.5193e-13	6.44425e-12	19.2627
F13A1	0.675707	1.55929	7.55195	1.60994e-13	6.79222e-12	19.2057
AC018695.1	0.675349	0.693868	7.53219	1.84899e-13	7.69501e-12	19.0695
IGFBP3	0.616278	4.63996	7.52895	1.89134e-13	7.84175e-12	19.0472
LTBP2	0.626844	2.39853	7.5254	1.93885e-13	8.01469e-12	19.0228
FERMT3	0.587398	2.86666	7.5002	2.31183e-13	9.45044e-12	18.8497
GAPDHP40	0.583128	0.946525	7.49854	2.33879e-13	9.53949e-12	18.8383
HLA-DRB1	0.843551	7.01328	7.47263	2.80113e-13	1.12265e-11	18.6609
OLFML3	0.637348	2.91115	7.4618	3.02021e-13	1.2026e-11	18.5868
PLTP	0.763407	4.96707	7.45367	3.19551e-13	1.26692e-11	18.5313
CCL18	1.12223	2.95769	7.44419	3.41266e-13	1.34338e-11	18.4666
RPS4XP8	0.618892	0.746236	7.43566	3.62054e-13	1.41915e-11	18.4085
SCT	0.671685	1.1896	7.42953	3.77747e-13	1.47335e-11	18.3668
HLA-DPA1	0.853616	4.16797	7.42361	3.93545e-13	1.52742e-11	18.3265
CLC	0.832988	1.19508	7.4229	3.95475e-13	1.53276e-11	18.3217
CYR61	0.748141	4.47588	7.41415	4.20141e-13	1.62153e-11	18.2622
AC241585.1	-0.646672	1.76924	-7.38297	5.2096e-13	1.97479e-11	18.0507
RPL11P3	0.762395	1.07699	7.37949	5.33583e-13	2.01573e-11	18.0271
RPS11P5	0.930037	2.93443	7.35819	6.1772e-13	2.3021e-11	17.8832
AL603825.1	-0.582562	1.3773	-7.35408	6.35423e-13	2.36489e-11	17.8554
DEPP1	0.649396	3.19353	7.34218	6.89466e-13	2.54886e-11	17.7752
TMSB10P1	0.880825	2.32034	7.34047	6.97586e-13	2.57543e-11	17.7637
METRN	0.615404	2.40678	7.32195	7.91941e-13	2.89478e-11	17.639
TGM2	0.620648	4.35421	7.31685	8.20032e-13	2.98955e-11	17.6047
HLA-L	0.769053	1.76583	7.3159	8.25377e-13	3.00507e-11	17.5983
KRT8P36	1.22591	1.69244	7.30197	9.07791e-13	3.2792e-11	17.5048
CD53	0.704701	3.3702	7.29346	9.62013e-13	3.4525e-11	17.4477
FBN1	0.670538	2.41194	7.29116	9.77264e-13	3.50496e-11	17.4323
COL11A1	0.806645	1.96945	7.28535	1.01674e-12	3.63946e-11	17.3934
SLC25A6P2	0.594187	0.686792	7.25924	1.21434e-12	4.2912e-11	17.2188
FKBP10	0.729027	4.39143	7.24884	1.30317e-12	4.57002e-11	17.1495
CCL11	0.714095	2.04928	7.24604	1.32823e-12	4.65199e-11	17.1308
LRRC15	0.588146	1.50645	7.24467	1.34063e-12	4.68355e-11	17.1216
RPL21P28	-0.611339	1.7621	-7.20928	1.70356e-12	5.81545e-11	16.8862
AC016739.1	0.978601	4.16285	7.20889	1.708e-12	5.82344e-11	16.8837
MALAT1	0.937623	4.14581	7.20805	1.71769e-12	5.85285e-11	16.8781
RPS19P3	0.638958	1.45379	7.19922	1.82328e-12	6.15947e-11	16.8195
ADAM12	0.604247	1.34253	7.19162	1.91914e-12	6.45963e-11	16.7692
SIRPA	0.585425	2.75963	7.14728	2.58598e-12	8.44691e-11	16.4763
AL049830.1	0.598734	0.692596	7.1409	2.69901e-12	8.75405e-11	16.4343
CTXN1	0.638224	1.62952	7.11335	3.24565e-12	1.03092e-10	16.2531
ARL4C	0.605214	3.01559	7.0894	3.80821e-12	1.19586e-10	16.0962
AC093840.1	0.796284	1.73911	7.07808	4.10666e-12	1.28085e-10	16.0221
COL5A2	0.737673	4.28972	7.07727	4.12872e-12	1.28628e-10	16.0169
COMTD1	0.603911	4.33903	7.05674	4.73249e-12	1.46202e-10	15.8829
CHCHD2P9	-0.725958	2.54911	-7.04571	5.09199e-12	1.56e-10	15.811
CD163	0.680098	1.93676	7.04077	5.26144e-12	1.6048e-10	15.7789
PCSK1N	0.931327	1.33016	7.0287	5.69943e-12	1.7298e-10	15.7004
HLA-DQB2	0.63373	1.79121	7.01616	6.19229e-12	1.86403e-10	15.619
MT-TF	0.99989	1.95435	7.0114	6.38997e-12	1.91727e-10	15.5881
RPL31P61	0.599914	0.716677	6.97878	7.92349e-12	2.34054e-10	15.377
RPL3P7	0.672042	1.37108	6.96219	8.83633e-12	2.57713e-10	15.2701
AL139095.2	0.700097	1.62912	6.95807	9.07884e-12	2.64228e-10	15.2435
RPL18P13	0.585447	0.800644	6.95275	9.40136e-12	2.72649e-10	15.2092
AC078817.1	0.710455	1.41259	6.95253	9.41484e-12	2.72858e-10	15.2078
CYP27A1	0.608466	3.77268	6.94223	1.00726e-11	2.89794e-10	15.1416
CST1	1.17525	3.79191	6.92992	1.09184e-11	3.12985e-10	15.0625
AC011495.1	0.617106	1.55639	6.91377	1.21346e-11	3.43808e-10	14.9589
FCGR3A	0.789342	2.99831	6.9135	1.21558e-11	3.44175e-10	14.9572
TRBC2	0.586966	2.72505	6.89991	1.32826e-11	3.73153e-10	14.8702
IGLJ6	0.602697	0.537047	6.89711	1.35276e-11	3.78746e-10	14.8523
AL139100.1	0.679709	1.62755	6.89661	1.3572e-11	3.79797e-10	14.8491
TNC	0.805426	3.16251	6.89291	1.39025e-11	3.8826e-10	14.8255
SOD3	0.890086	4.95606	6.88042	1.50809e-11	4.18001e-10	14.7457
IGFBP5	0.79442	5.00504	6.86518	1.66509e-11	4.5648e-10	14.6486
MDK	0.639109	5.87761	6.84543	1.8926e-11	5.12997e-10	14.523
LY6E	0.757635	5.55987	6.83055	2.08406e-11	5.5995e-10	14.4285
ACTG2	0.968074	3.851	6.82362	2.1794e-11	5.81608e-10	14.3846
COL15A1	0.623542	3.38102	6.81415	2.31685e-11	6.13079e-10	14.3247
AQP1	0.645857	3.91281	6.79176	2.6766e-11	7.01092e-10	14.1832
FPR3	0.62252	2.29937	6.7851	2.79375e-11	7.26954e-10	14.1412
IGHV4-61	1.02112	2.14152	6.78299	2.83205e-11	7.36226e-10	14.1278
MT2A	0.675246	5.12394	6.77827	2.91928e-11	7.57122e-10	14.0981
HLA-DQB1	0.780774	3.62774	6.77486	2.98391e-11	7.72435e-10	14.0766
LRRC26	0.999063	1.87942	6.73359	3.88712e-11	9.80526e-10	13.8175
HNRNPUP1	0.586259	1.16219	6.73188	3.92972e-11	9.90368e-10	13.8068
AC136632.1	0.680412	2.75816	6.72397	4.13342e-11	1.03981e-09	13.7573
AC010343.1	0.774601	2.94895	6.70767	4.58641e-11	1.14387e-09	13.6554
AOC3	0.616964	2.15086	6.70323	4.71797e-11	1.1735e-09	13.6277
HLA-DRB5	0.898037	5.20357	6.70104	4.78412e-11	1.18782e-09	13.614
IFITM2	0.625016	6.0576	6.68547	5.28201e-11	1.30324e-09	13.5171
RPL37P2	0.669025	2.02491	6.67801	5.53858e-11	1.36059e-09	13.4706
AC034236.1	-0.649905	3.65151	-6.67419	5.6745e-11	1.38923e-09	13.4468
RPS6P25	0.625349	1.45001	6.66082	6.17634e-11	1.49651e-09	13.3638
COL6A3	0.719415	4.1791	6.6596	6.22412e-11	1.50677e-09	13.3563
MT-TL1	1.00279	3.05318	6.65224	6.52101e-11	1.57107e-09	13.3106
CYBRD1	0.593748	2.82901	6.62492	7.74964e-11	1.84377e-09	13.1416
MMP9	0.833423	3.89017	6.62088	7.94936e-11	1.8856e-09	13.1167
PFN1P1	0.600136	1.65248	6.60528	8.77009e-11	2.06258e-09	13.0205
SERPINE1	0.722798	3.37929	6.56665	1.11765e-10	2.57807e-09	12.7831
POSTN	0.91825	4.25552	6.56523	1.1276e-10	2.59775e-09	12.7744
RAMP1	0.921521	2.8975	6.53764	1.33979e-10	3.01743e-09	12.6056
IGLC2	1.23739	6.87391	6.53645	1.34981e-10	3.03752e-09	12.5983
IGHV4-55	0.857287	2.03299	6.50544	1.63724e-10	3.61513e-09	12.4094
AC114491.1	0.599611	1.48219	6.47917	1.9269e-10	4.18946e-09	12.25
AMN	0.632939	3.27477	6.4788	1.93141e-10	4.1976e-09	12.2477
SRGN	0.702345	4.88706	6.47377	1.99239e-10	4.32334e-09	12.2173
HLA-DQA1	0.672908	2.82119	6.44611	2.36365e-10	5.06333e-09	12.0502
AC131235.1	0.639288	2.30008	6.43514	2.52892e-10	5.37777e-09	11.9841
ASPN	0.773616	2.39163	6.42996	2.61084e-10	5.53495e-09	11.9529
CTGF	0.581947	5.42631	6.41015	2.94896e-10	6.19218e-09	11.8338
CD74	0.663687	8.04878	6.40718	3.00311e-10	6.2965e-09	11.816
TPSB2	0.607396	1.85088	6.40053	3.1281e-10	6.53379e-09	11.7761
TNS1	0.591244	2.27647	6.38756	3.38674e-10	7.03149e-09	11.6985
HLA-DRA	0.780179	7.77781	6.35834	4.04857e-10	8.27196e-09	11.5239
SPP1	1.17193	4.71708	6.34653	4.35054e-10	8.83992e-09	11.4536
SULT1B1	-0.656499	2.59993	-6.34056	4.51137e-10	9.13648e-09	11.4181
MT-TM	1.07506	2.44304	6.29416	5.97758e-10	1.17863e-08	11.1431
S100A9	0.78959	5.30722	6.28895	6.16879e-10	1.21157e-08	11.1124
HLA-DRB6	0.703327	3.11775	6.28783	6.21037e-10	1.21844e-08	11.1058
MXRA5	0.646168	2.91123	6.27895	6.55253e-10	1.27786e-08	11.0534
MT-TV	0.785313	1.34977	6.26663	7.05755e-10	1.36766e-08	10.9809
VCAN	0.609363	2.65503	6.26359	7.18826e-10	1.38909e-08	10.9629
IGLV4-69	1.17053	3.46761	6.24124	8.222e-10	1.56857e-08	10.8317
LMOD1	0.657013	2.17638	6.23301	8.63814e-10	1.64342e-08	10.7835
RPL10P6	0.939723	2.83257	6.21098	9.85573e-10	1.85148e-08	10.6547
PRELP	0.627783	1.41073	6.19785	1.06603e-09	1.98709e-08	10.578
HSPB6	0.700504	1.87569	6.15025	1.41499e-09	2.57925e-08	10.3016
CHI3L1	0.674307	2.89356	6.1438	1.47013e-09	2.66923e-08	10.2643
IGHV3-48	0.968441	2.87849	6.13494	1.5493e-09	2.79278e-08	10.2131
IGLV3-10	1.153	3.357	6.07171	2.24868e-09	3.92793e-08	9.84958
IGHV4-28	0.835287	2.28616	6.04769	2.58838e-09	4.46627e-08	9.71235
CLDN3	0.592668	8.14308	6.04059	2.69802e-09	4.63231e-08	9.67189
IGLV1-40	1.2009	5.03428	5.98238	3.78552e-09	6.31889e-08	9.34168
PHGR1	0.908602	6.98966	5.96719	4.13343e-09	6.84252e-08	9.25598
AC004453.1	0.606333	3.35144	5.91826	5.47987e-09	8.8582e-08	8.9812
TPT1P9	0.581786	1.92913	5.90613	5.87471e-09	9.42477e-08	8.91342
CRABP2	0.67436	2.35653	5.90299	5.9816e-09	9.58195e-08	8.89585
COL12A1	0.613357	3.83074	5.89828	6.14507e-09	9.81011e-08	8.86959
CHRDL2	0.635286	1.29184	5.88257	6.72289e-09	1.06587e-07	8.78205
IGHV4-31	0.984525	3.06742	5.85687	7.78403e-09	1.21837e-07	8.63933
AC016596.1	-0.652648	3.00515	-5.85156	8.02274e-09	1.2529e-07	8.60991
IGLV6-57	1.04898	3.38687	5.83214	8.95845e-09	1.38378e-07	8.50251
FN1	0.851066	5.12991	5.73297	1.56588e-08	2.30106e-07	7.95908
IGKV4-1	1.19286	5.85226	5.7208	1.67601e-08	2.45052e-07	7.89297
MARCO	0.606911	1.15148	5.71905	1.69248e-08	2.47003e-07	7.88346
APOC1	0.686292	3.44805	5.68705	2.02251e-08	2.90791e-07	7.71024
SNORD104	0.588955	3.95425	5.62362	2.87161e-08	3.98463e-07	7.36953
FO393411.1	0.583768	2.0681	5.62287	2.88355e-08	3.99719e-07	7.3655
IGKV1D-8	0.625219	1.44773	5.60648	3.15509e-08	4.33339e-07	7.27806
OR2I1P	0.741542	3.12079	5.59654	3.33184e-08	4.55014e-07	7.22511
WNT11	0.767255	2.5842	5.59063	3.44137e-08	4.68352e-07	7.19369
IGLV3-21	1.13284	4.73222	5.58493	3.55037e-08	4.81644e-07	7.1634
IGLV2-23	1.10849	4.74996	5.56988	3.85464e-08	5.18973e-07	7.08354
DES	1.13467	3.94003	5.56382	3.98412e-08	5.34582e-07	7.05146
RTL8A	0.604435	4.24952	5.54226	4.48021e-08	5.94935e-07	6.93751
AL162151.2	0.606504	2.90944	5.44738	7.47391e-08	9.45885e-07	6.4409
IGLV2-14	1.09935	5.38854	5.43445	8.00915e-08	1.00602e-06	6.37382
AC026403.1	-0.611079	3.3622	-5.39693	9.78161e-08	1.2078e-06	6.17998
IGLV3-9	0.81068	2.26362	5.39243	1.00181e-07	1.23369e-06	6.15682
IGKV1-5	1.068	5.67097	5.34686	1.27484e-07	1.53336e-06	5.92325
IGKV3-15	0.968379	4.53087	5.33959	1.32463e-07	1.58623e-06	5.88613
IGKV1-6	0.905299	3.33206	5.31884	1.47723e-07	1.75125e-06	5.78052
IGLV1-47	0.983117	4.03713	5.31367	1.51786e-07	1.79365e-06	5.75424
IGHG3	1.00558	4.80312	5.30623	1.57819e-07	1.8574e-06	5.71649
CCL19	0.61467	1.67883	5.30033	1.62774e-07	1.91001e-06	5.68656
IFI6	0.649624	6.41127	5.2588	2.02122e-07	2.32002e-06	5.47695
IGHG1	1.06529	6.53157	5.23845	2.24625e-07	2.55391e-06	5.37479
AGR2	-0.604913	7.73613	-5.23247	2.31692e-07	2.62724e-06	5.34482
IGHG4	1.08735	5.63062	5.19563	2.80188e-07	3.12206e-06	5.16097
KRT17	0.706417	2.50105	5.10831	4.37641e-07	4.69594e-06	4.7299
SRPX2	0.601042	3.3916	5.06567	5.42825e-07	5.71989e-06	4.52187
IGLV3-19	1.04615	4.83266	5.03404	6.36248e-07	6.5974e-06	4.36857
IGLV9-49	0.683211	1.60231	5.00974	7.18384e-07	7.3498e-06	4.2514
IGLV3-25	1.01575	4.56203	4.9936	7.78491e-07	7.90187e-06	4.17387
IGHV3-33	0.893771	3.5018	4.96177	9.11631e-07	9.14244e-06	4.02161
IGHV3-30	0.931712	4.20617	4.94594	9.85764e-07	9.8306e-06	3.94623
RPS28P7	-0.942625	6.86741	-4.90833	1.18594e-06	1.16337e-05	3.76805
IGLV7-43	0.766259	2.5116	4.84194	1.63881e-06	1.56458e-05	3.45656
IGLV1-51	0.93282	4.642	4.839	1.66236e-06	1.58487e-05	3.44283
IGHV1-69	0.797432	2.45525	4.80879	1.92332e-06	1.80687e-05	3.3025
IGLL5	0.768749	3.09364	4.77709	2.23961e-06	2.07578e-05	3.15606
IGKV2-24	0.792087	2.92123	4.76905	2.32744e-06	2.15105e-05	3.11907
IGLV2-8	0.827958	3.27722	4.76151	2.4128e-06	2.22251e-05	3.08443
IGLC7	0.667356	1.82327	4.70467	3.1607e-06	2.84123e-05	2.82495
IGLV3-27	0.671805	1.92993	4.6625	3.85478e-06	3.40221e-05	2.63432
IGLV5-45	0.70614	2.09081	4.65997	3.90085e-06	3.44176e-05	2.62292
IGHV4-39	0.972277	4.76083	4.65866	3.92485e-06	3.46121e-05	2.61703
IGHV1-24	0.805856	2.92122	4.63879	4.30719e-06	3.76304e-05	2.52781
IGHA1	1.06333	8.28876	4.62255	4.64596e-06	4.0234e-05	2.45517
IGKV1-27	0.771664	3.21833	4.58628	5.4975e-06	4.67583e-05	2.29377
IGHV4-34	0.812203	3.7482	4.55123	6.46144e-06	5.40996e-05	2.13893
IGLV4-60	0.680748	1.77928	4.5488	6.53401e-06	5.46409e-05	2.12823
AGR3	-0.701331	4.22178	-4.53258	7.03825e-06	5.85211e-05	2.05701
RPS14P8	0.639358	1.96363	4.52518	7.28061e-06	6.03004e-05	2.02459
IGHV1-46	0.801526	3.47234	4.49499	8.35507e-06	6.84405e-05	1.89279
IGLV2-18	0.666338	2.11184	4.47738	9.04999e-06	7.3501e-05	1.81632
IGLV1-36	0.590843	1.67482	4.44246	1.05955e-05	8.47703e-05	1.6655
IGHV3-73	0.732018	2.73715	4.42551	1.14339e-05	9.08074e-05	1.59269
IGHV3-53	0.648319	2.41242	4.3969	1.29948e-05	0.000101843	1.47039
MMP1	0.76343	4.71066	4.3939	1.31701e-05	0.000103075	1.45758
CXCL10	0.632059	3.65096	4.38186	1.3895e-05	0.000108147	1.40639
CXCL9	0.596381	2.9613	4.32582	1.78043e-05	0.000135333	1.16972
AL591846.1	0.71043	1.91281	4.32089	1.81943e-05	0.000138051	1.14905
IGHV3-23	0.859153	5.42984	4.28088	2.16767e-05	0.000161765	0.982028
IGLV2-11	0.86785	4.53248	4.27993	2.17668e-05	0.000162415	0.978072
IGKV1-9	0.808574	3.77495	4.2758	2.21624e-05	0.000164988	0.960906
IGHV1-18	0.846048	4.75351	4.22133	2.80596e-05	0.000203918	0.736139
IGHG2	0.833896	6.42592	4.22094	2.81067e-05	0.000204234	0.734541
IGLC3	0.838051	5.90585	4.21701	2.8587e-05	0.00020726	0.718411
IGKV1-17	0.744639	3.4175	4.19136	3.19154e-05	0.000228733	0.613587
IGHV3-72	0.677653	2.68896	4.15083	3.79354e-05	0.000266271	0.44924
IGHV1-69D	0.748631	3.30938	4.14463	3.89478e-05	0.000272684	0.424203
IGLV8-61	0.782024	3.0516	4.1406	3.96195e-05	0.000276997	0.40795
ASCL2	0.583232	5.55917	4.13013	4.14141e-05	0.000288526	0.36585
IGKV1-16	0.720576	3.50128	4.11779	4.36298e-05	0.000302551	0.316331
MSLN	0.694686	3.81387	4.09196	4.86374e-05	0.000333759	0.213146
IGHV4-59	0.767797	4.09478	4.06821	5.37197e-05	0.000364829	0.118813
NPTX2	0.615812	1.81474	4.02624	6.39595e-05	0.00042743	-0.0466594
IGHV3-15	0.784625	4.33525	3.99902	7.15596e-05	0.000472685	-0.153062
IGHA2	1.03098	6.93248	3.9708	8.03413e-05	0.000525231	-0.262681
IGKV3-20	0.778229	6.14783	3.94238	9.02136e-05	0.000581043	-0.372358
IGHV5-51	0.81083	4.92971	3.92439	9.70417e-05	0.000620465	-0.441363
L1TD1	-0.626608	1.70752	-3.91928	9.90713e-05	0.000632052	-0.460933
IGKC	0.746199	7.52749	3.78454	0.000169492	0.00102489	-0.967707
CXCL8	0.607417	4.38754	3.76721	0.000181401	0.00108872	-1.03166
RNU4-2	0.630286	1.49133	3.74581	0.000197199	0.00117343	-1.11026
IGLV1-44	0.681228	4.00089	3.7397	0.000201934	0.00119841	-1.13259
IGHV3-74	0.662166	3.5867	3.70945	0.000227036	0.00133162	-1.24277
CYP2W1	0.672804	3.00285	3.66144	0.000272995	0.00156822	-1.41593
MTND4P12	-0.702673	3.53141	-3.65506	0.00027972	0.00160186	-1.43877
CLDN2	-0.663992	4.53731	-3.57296	0.000381381	0.00211614	-1.72933
IGF2	0.862376	3.38963	3.54433	0.000424323	0.00232723	-1.82915
IGLV7-46	0.637305	3.00954	3.53792	0.00043454	0.00237642	-1.8514
IGHV3-11	0.618301	3.56914	3.39771	0.000724616	0.00373617	-2.32834
IGLV3-1	0.624257	3.65085	3.37198	0.00079443	0.00405229	-2.41388
IGHV3-49	0.59356	3.32751	3.35423	0.000846147	0.00428681	-2.47248
RN7SL2	-0.590452	6.1324	-3.32984	0.000922363	0.0046326	-2.55255
IGHM	0.629958	5.12534	3.23703	0.00127451	0.00617731	-2.85209
PPBP	0.590108	1.55685	3.18945	0.00149994	0.00714888	-3.00251
